# Supplementary material
Source: publisher figshare collection journal article supplement (https://acs.figshare.com/ndownloader/files/5203804)
Supplement: Supplementary file 1 [file 5203804]

## Supporting Information

# Multidentate Polysarcosine-Based Ligands for Water-Soluble Quantum Dots

*Ana Fokina<sup>1,2‡</sup>, Kristina Klinker<sup>1,2‡</sup>, Lydia Braun<sup>1</sup>, Byeong Guk Jeong<sup>3,4</sup>, Wan Ki Bae<sup>3</sup>, Matthias Barz<sup>1\*</sup>, Rudolf Zentel<sup>1\*</sup>*

<sup>1</sup>Institute for Organic Chemistry Johannes Gutenberg-Universität Mainz,  
Duesbergweg 10-14, 55128 Mainz, Germany

<sup>2</sup>Graduate School Materials Science in Mainz, Staudinger Weg 9, 55128 Mainz,  
Germany

<sup>3</sup>Photo-Electronic Hybrids Research Center, National Agenda Research Division,  
Korea Institute of Science and Technology, 14-gil 5, Hwarang ro, Seongbuk gu, Seoul  
02792, Korea

<sup>4</sup>School of Chemical and Biological Engineering, The National Creative Research  
Initiative Center for Intelligent Hybrids, Seoul National University, 1 Gwanak-ro,  
Gwanak-gu, Seoul 08826, Korea

# <sup>1</sup>H NMR Characterization

## Anchor Compounds

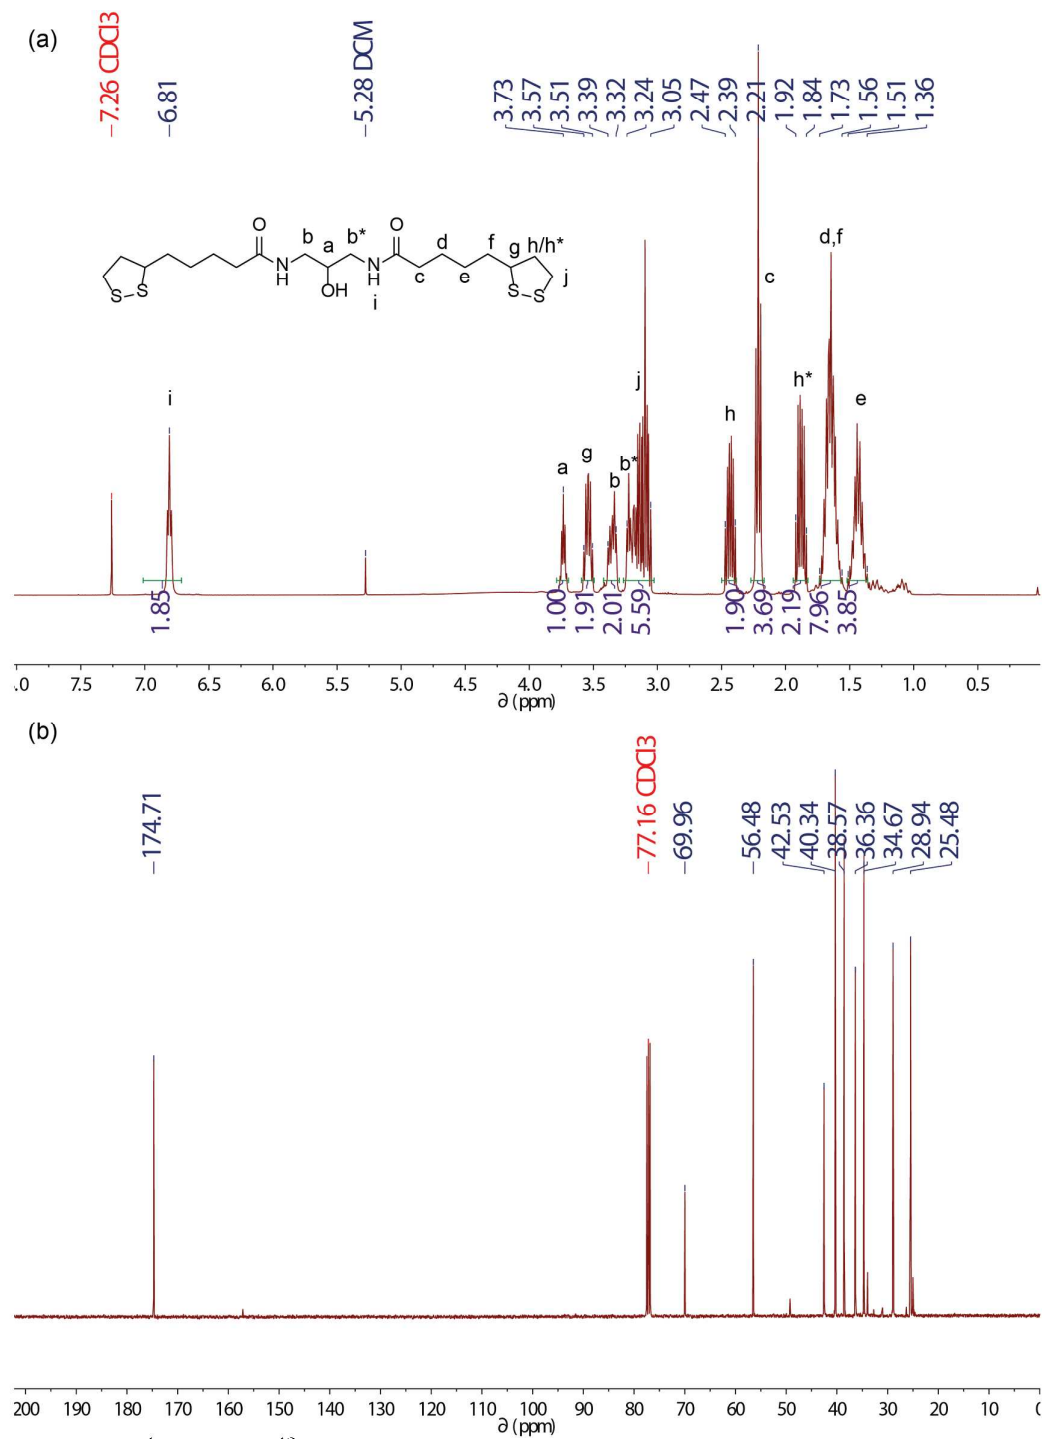

Figure S 1. <sup>1</sup>H (a) and <sup>13</sup>C (b) NMR spectra of compound **2** in CDCl<sub>3</sub>.



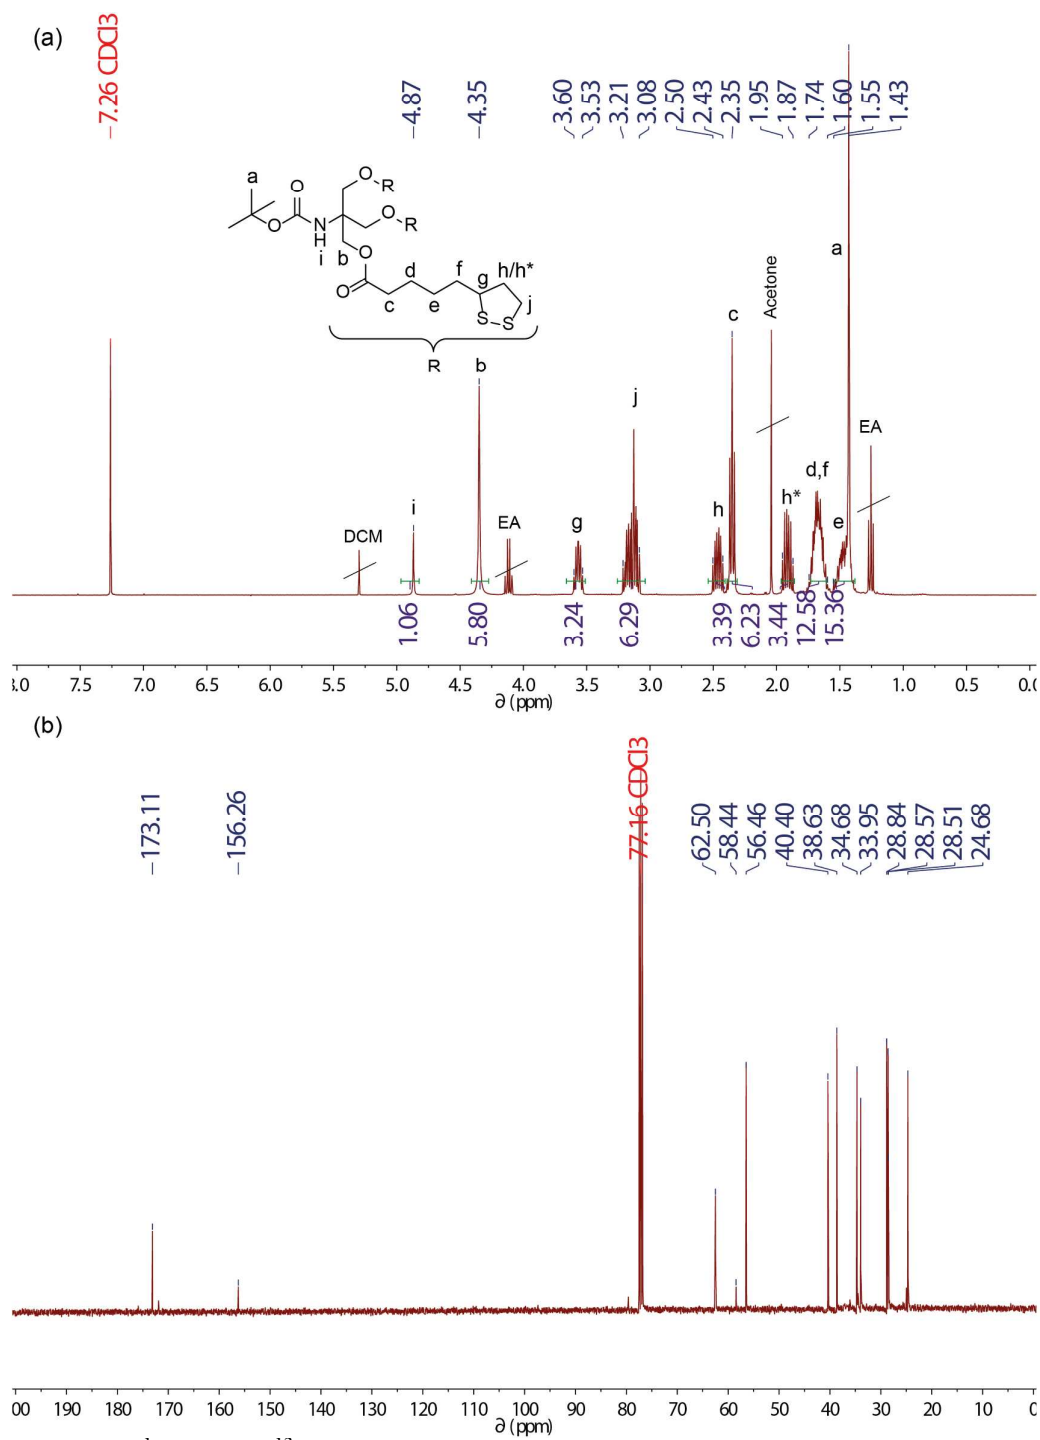

Figure S 3.  $^1\text{H}$  (a) and  $^{13}\text{C}$  (b) NMR spectra of compound **5** in  $\text{CDCl}_3$ .

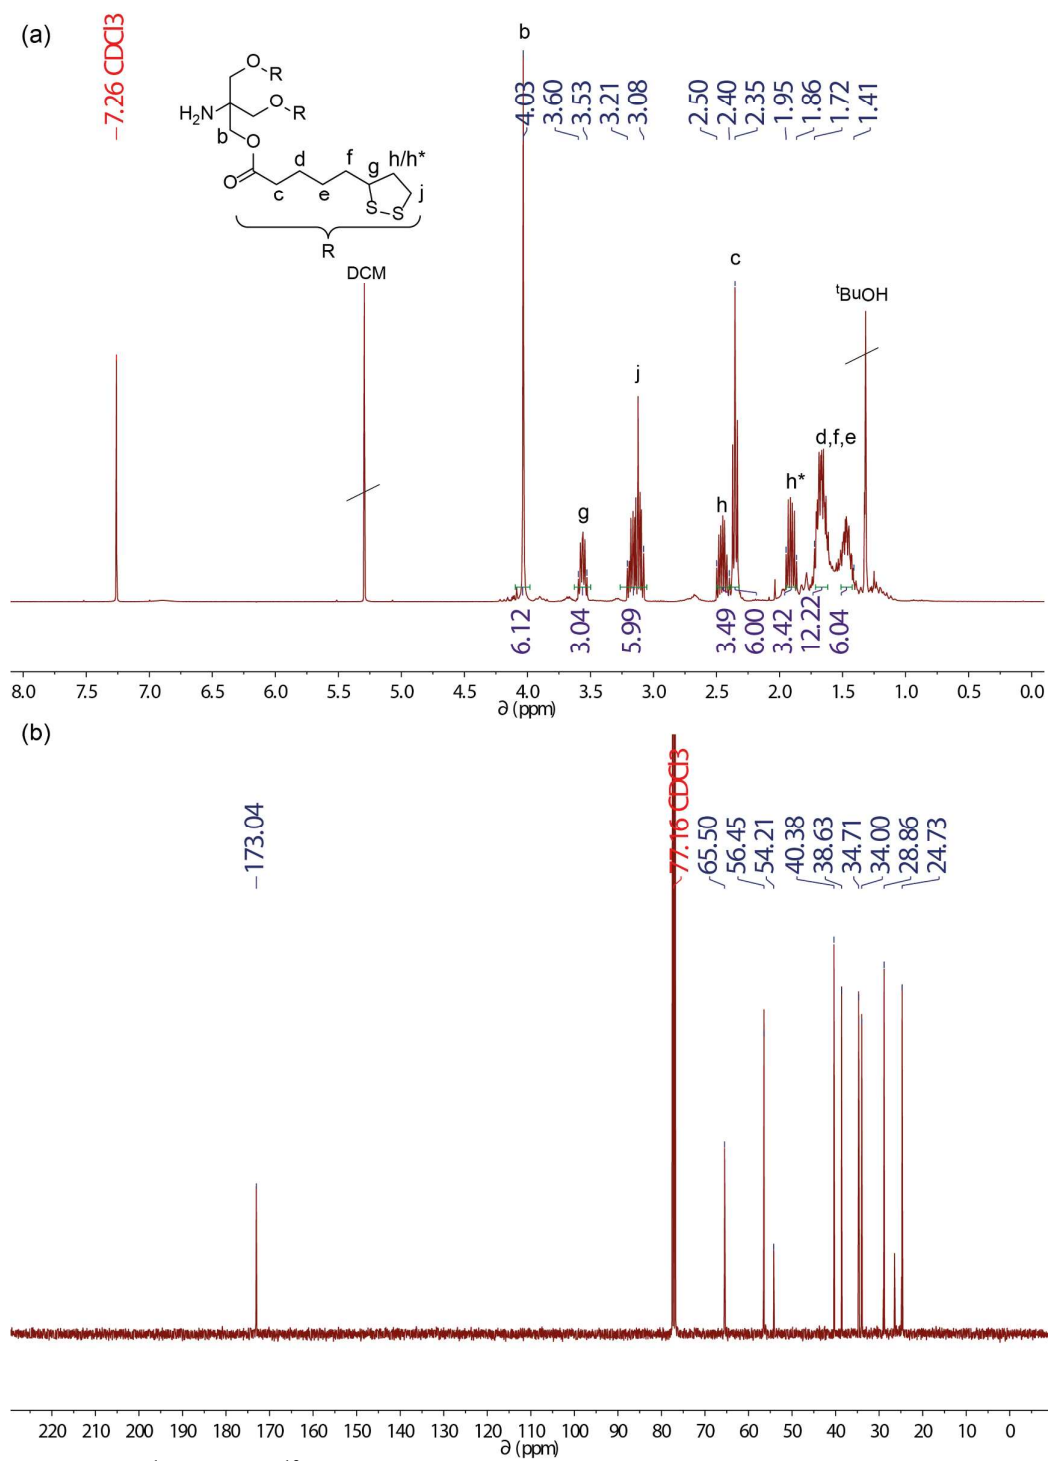

Figure S 4.  $^1\text{H}$  (a) and  $^{13}\text{C}$  (b) NMR spectra of compound **6** in  $\text{CDCl}_3$ .

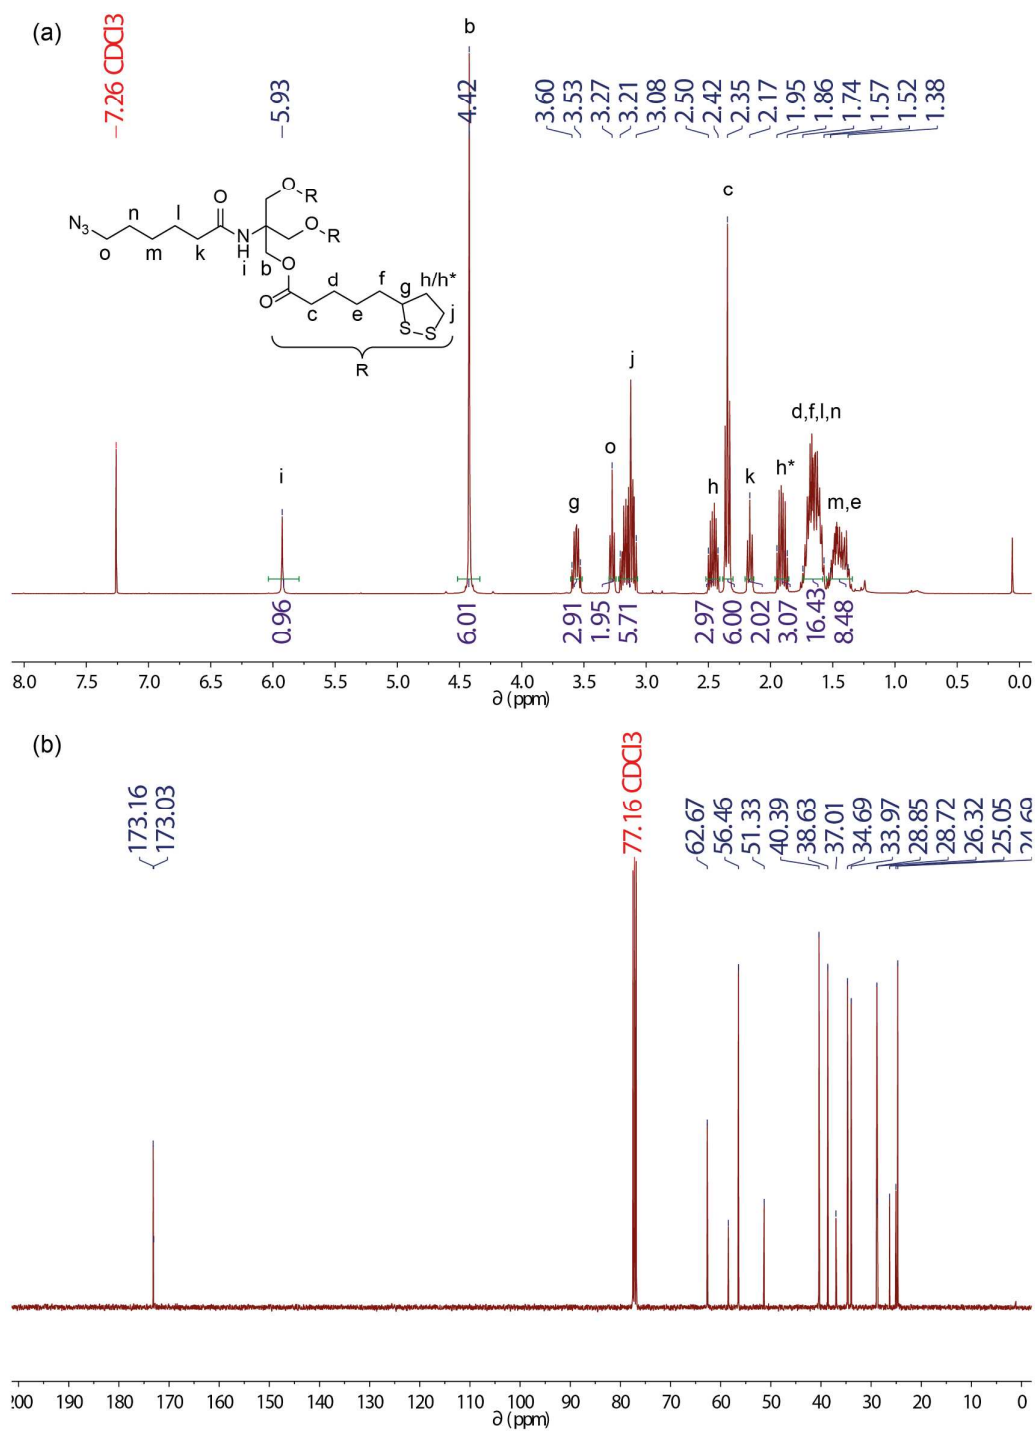

Figure S 5. <sup>1</sup>H (a) and <sup>13</sup>C (b) NMR spectra of compound **A2** in CDCl<sub>3</sub>.

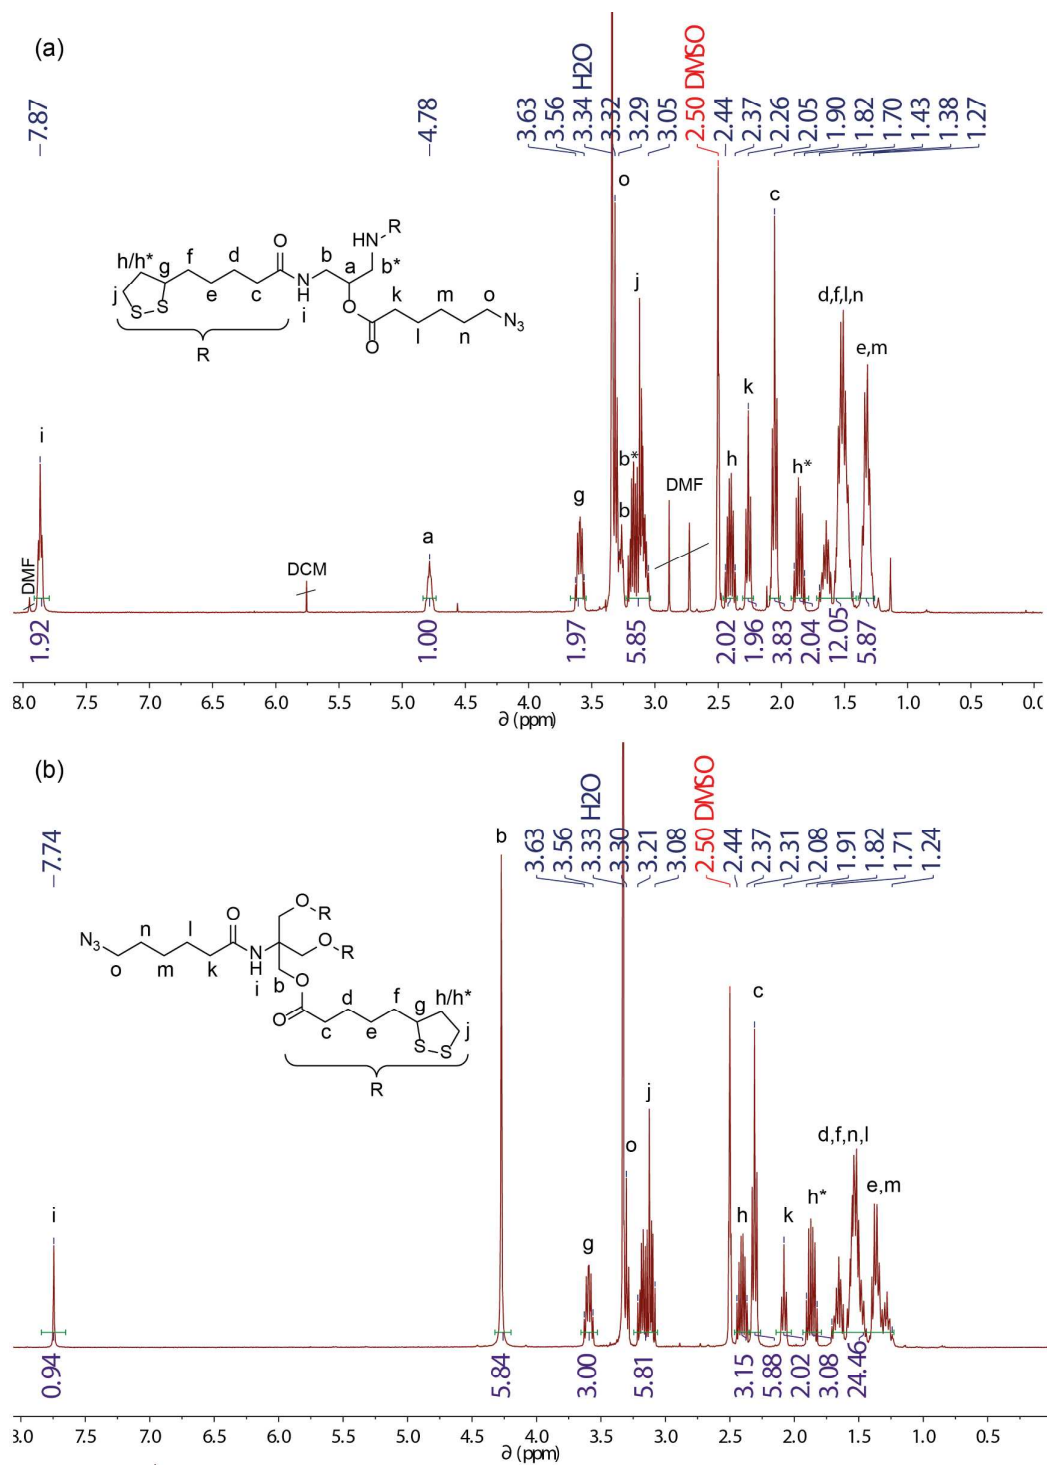

Figure S 6. <sup>1</sup>H NMR spectra of compounds **A1** (a) and **A2** (b) in DMSO-*d*<sub>6</sub>.

## End-capped Precursor Polymers

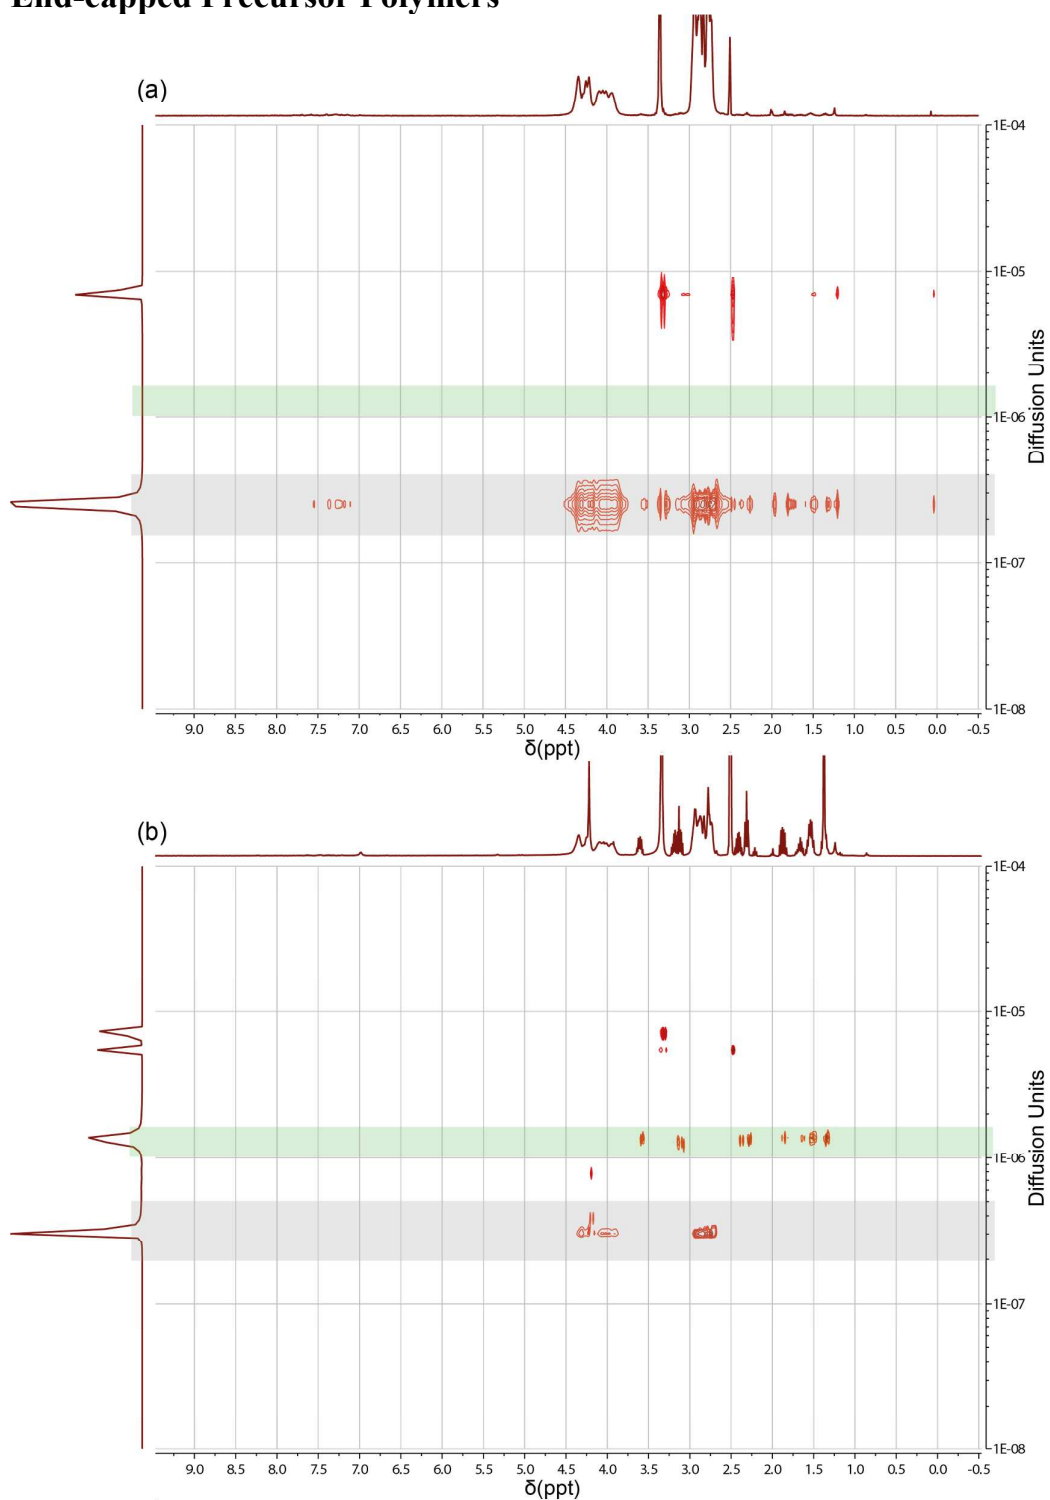

Figure S 7.  $^1\text{H}$  DOSY spectra of PL2a (a) and a mixture of DBCO-PSar and compound **5** (b). The green line marking the diffusion area of the compound **5** and the gray line marking the diffusion are of PSar-based **PL2a** and DBCO-PSar.



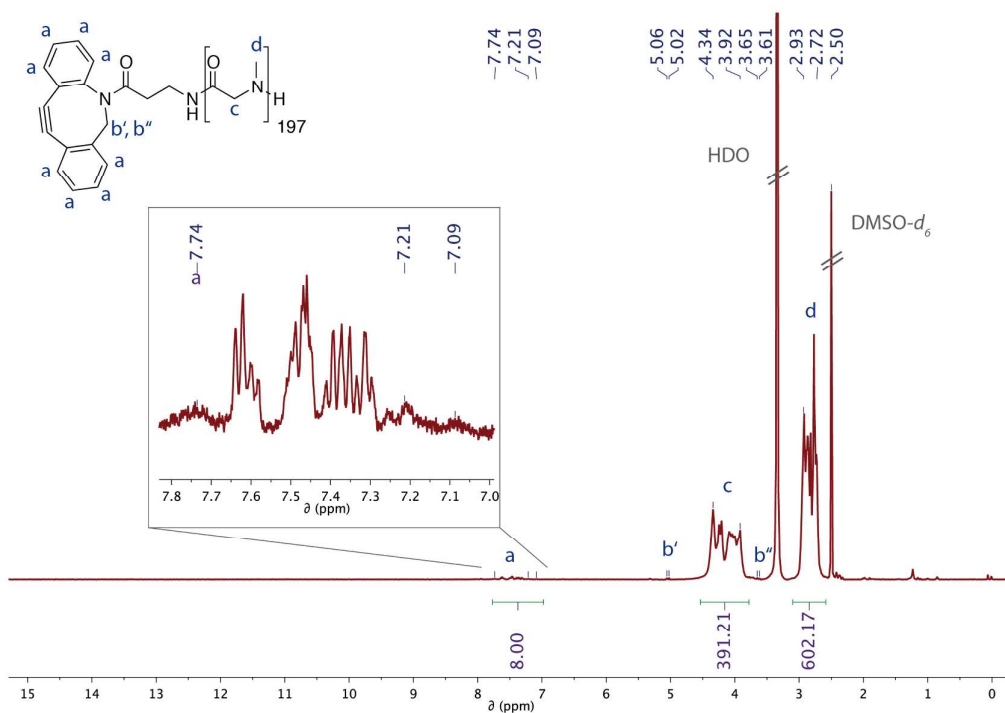

Figure S 8.  $^1\text{H}$  NMR (400 MHz) of PSar-DBCO (PC1) in  $\text{DMSO}-d_6$ .

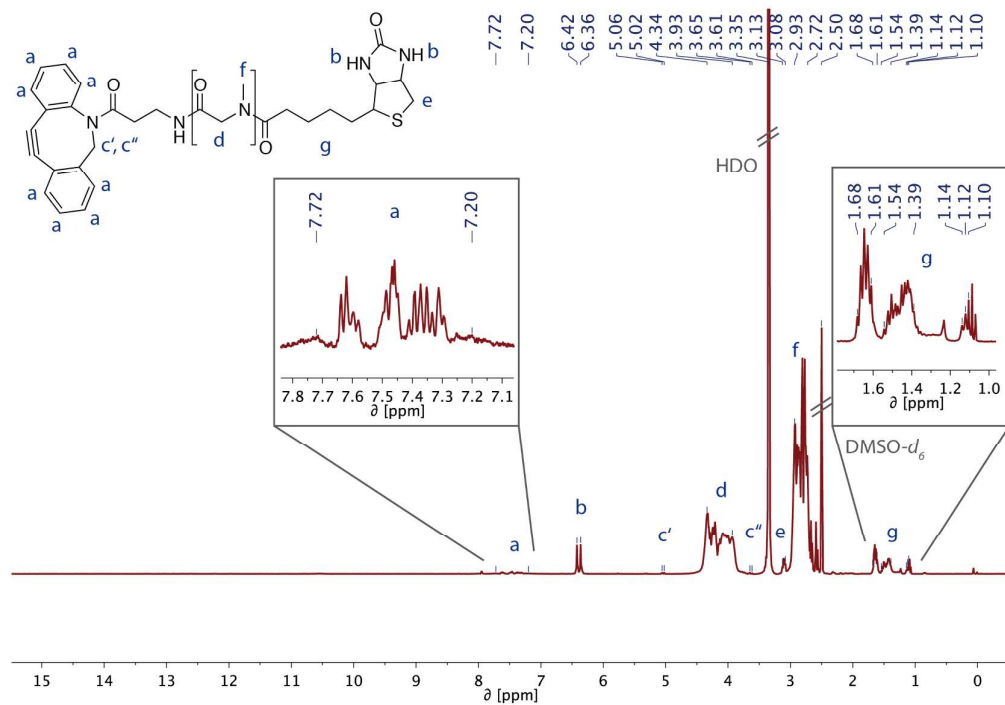

Figure S 10:  $^1\text{H}$  NMR spectrum (400 MHz) of PSar-DBCO-biotin (PC3) in  $\text{DMSO}-d_6$  (before purification of excess biotin-NHS ester).

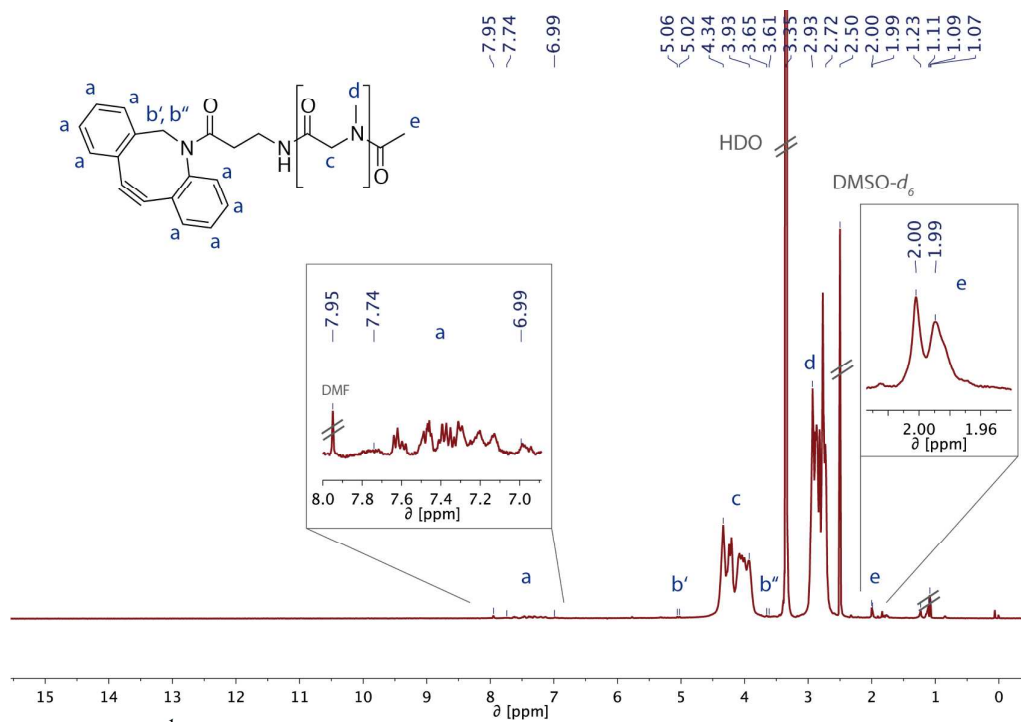

Figure S 11: <sup>1</sup>H NMR spectrum (400 MHz) of PSar-DBCO-acetyl (PC2) in DMSO-*d*<sub>6</sub>.

## Functionalization with Lipoic Acid Di- and Trifunctional Linkers

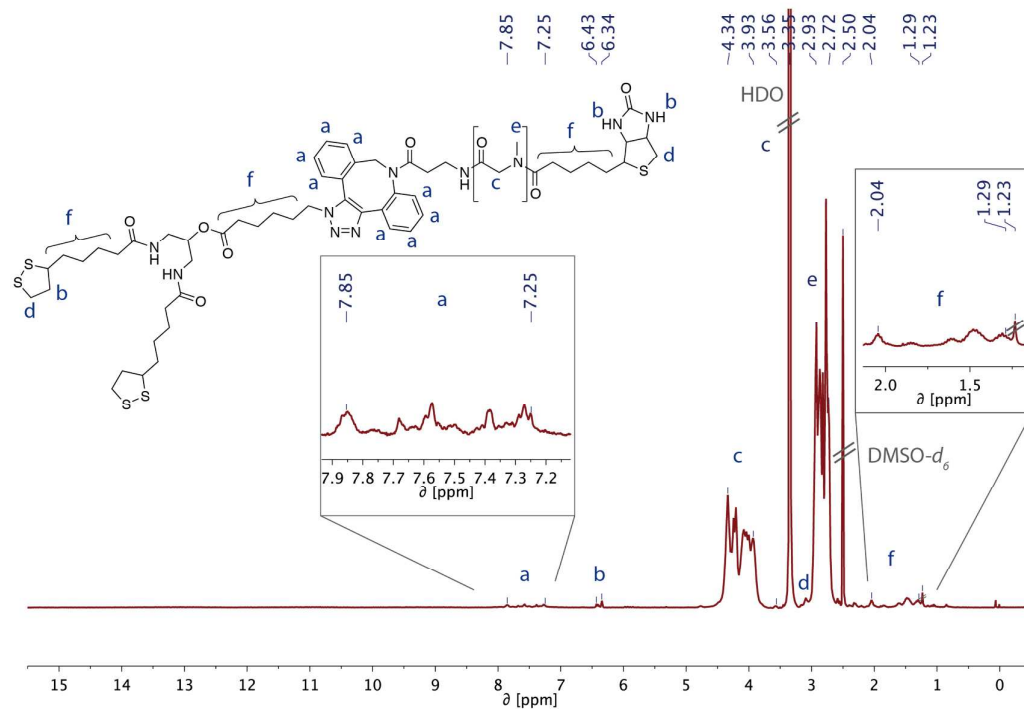

Figure S 12: <sup>1</sup>H NMR spectrum (400 MHz) of diliponate-PSar-biotin (PL1b) in DMSO-*d*<sub>6</sub>.

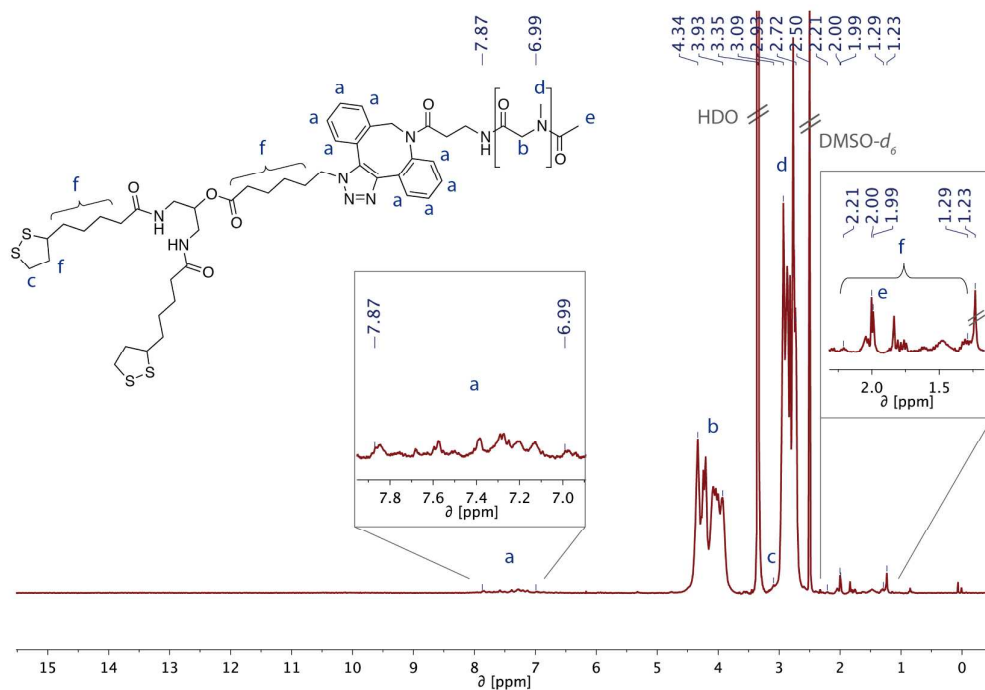

Figure S 13: <sup>1</sup>H NMR spectrum (400 MHz) of diliponate-PSar-acetyl (PL1a) in DMSO-*d*<sub>6</sub>.

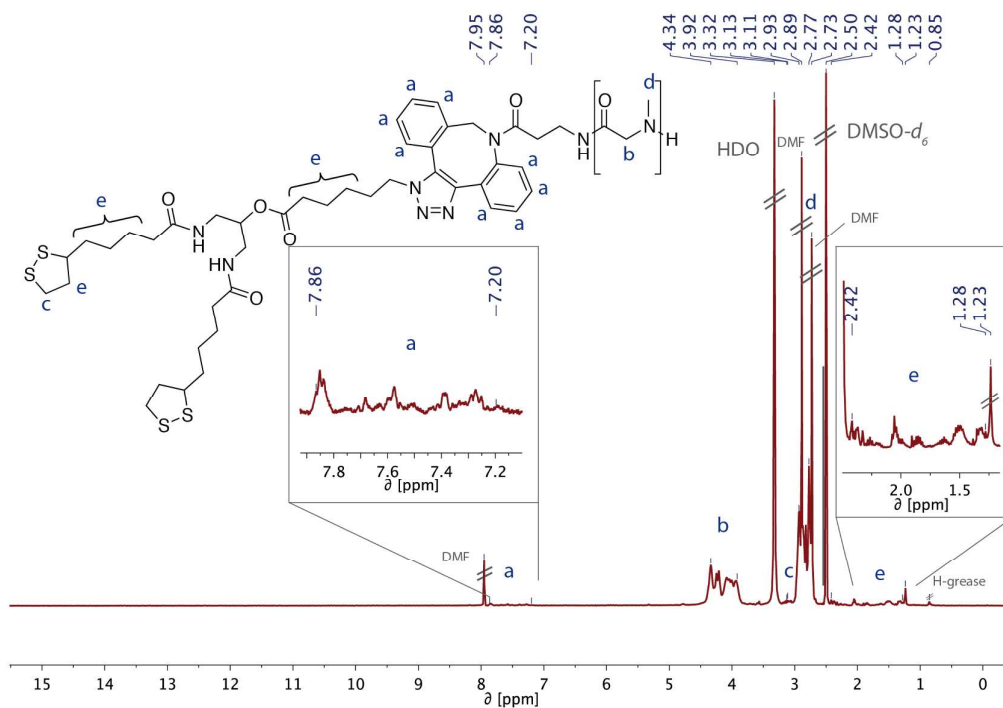

Figure S 14:  $^1\text{H}$  NMR spectrum (400 MHz) of diliponate-PSar (PL1c) in  $\text{DMSO-}d_6$ .

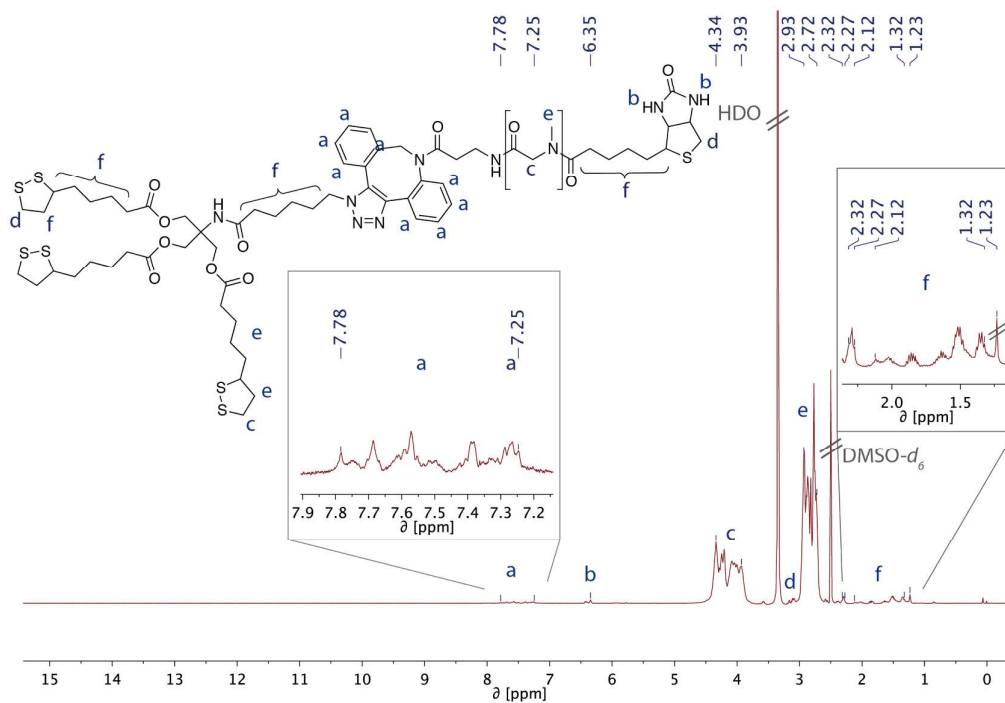

Figure S 15:  $^1\text{H}$  NMR spectrum (400 MHz) of trilipate-PSar-biotin (PL2b) in  $\text{DMSO-}d_6$ .

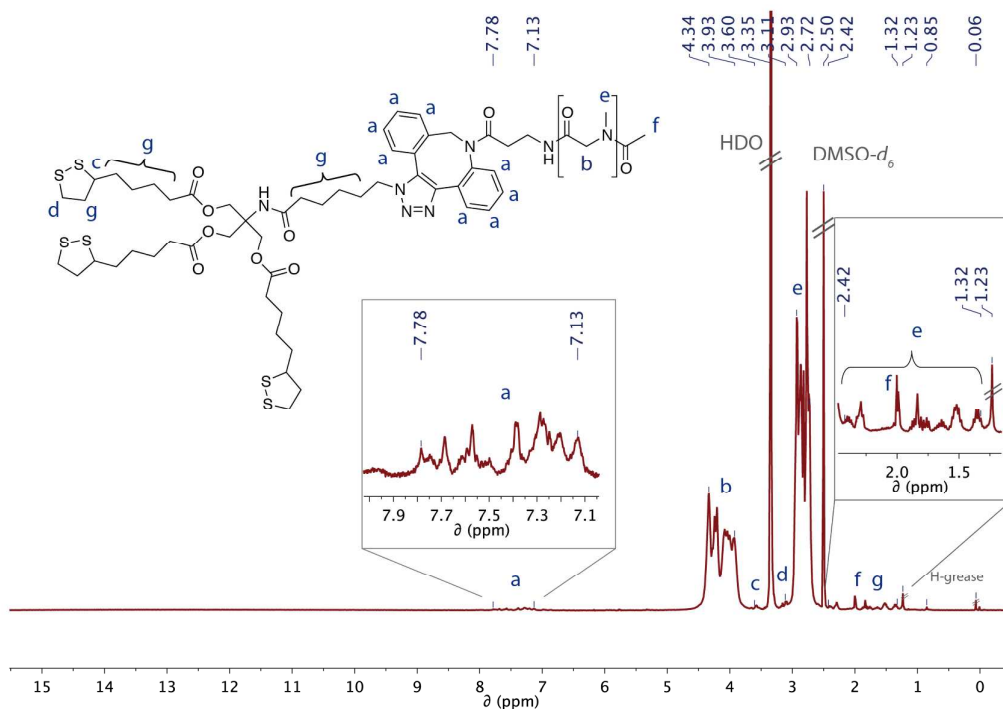

Figure S 16:  $^1\text{H}$  NMR spectrum (400 MHz) of trilipate-PSar-acetyl in  $\text{DMSO-}d_6$ .

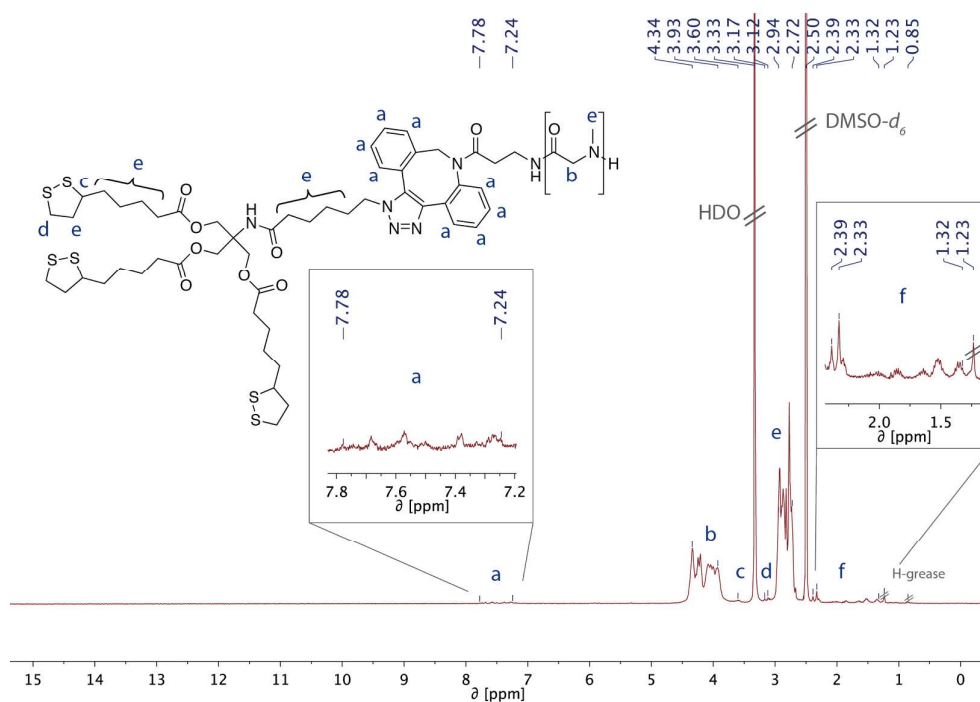

Figure S 17:  $^1\text{H}$  NMR spectrum (400 MHz) of triliponate-PSar in  $\text{DMSO}-d_6$ .

### GPC Characterization:

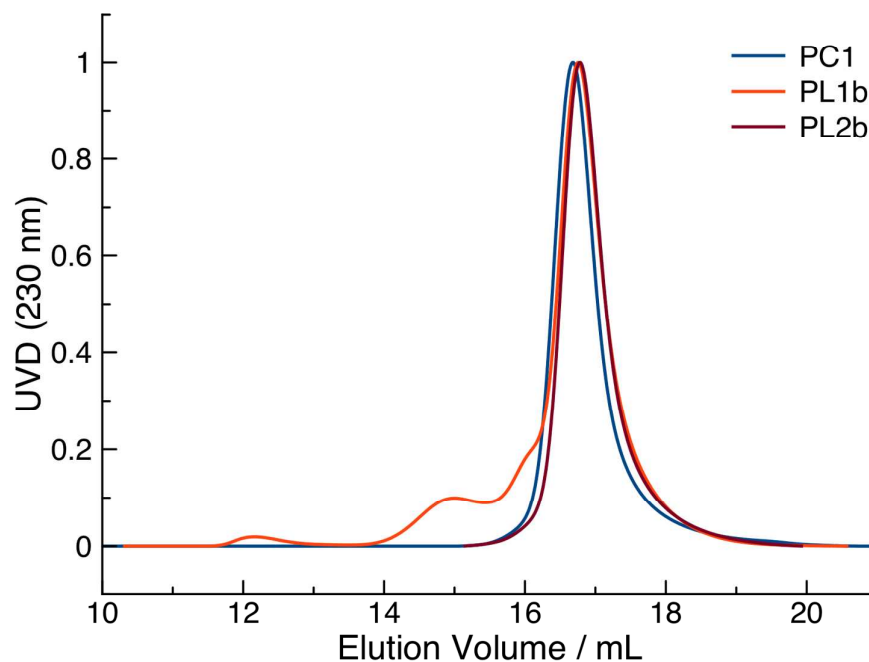

Figure S 18: GPC elugram (in HFIP) of **PC1**, **PL1b** and **PL2b** (di- and trilipoic acid anchors and biotin as post polymerization modification respectively). High molecular

weight tailing of **PL1b** can be explained by cross-linking of polymer chains due the dynamic nature of disulfides.

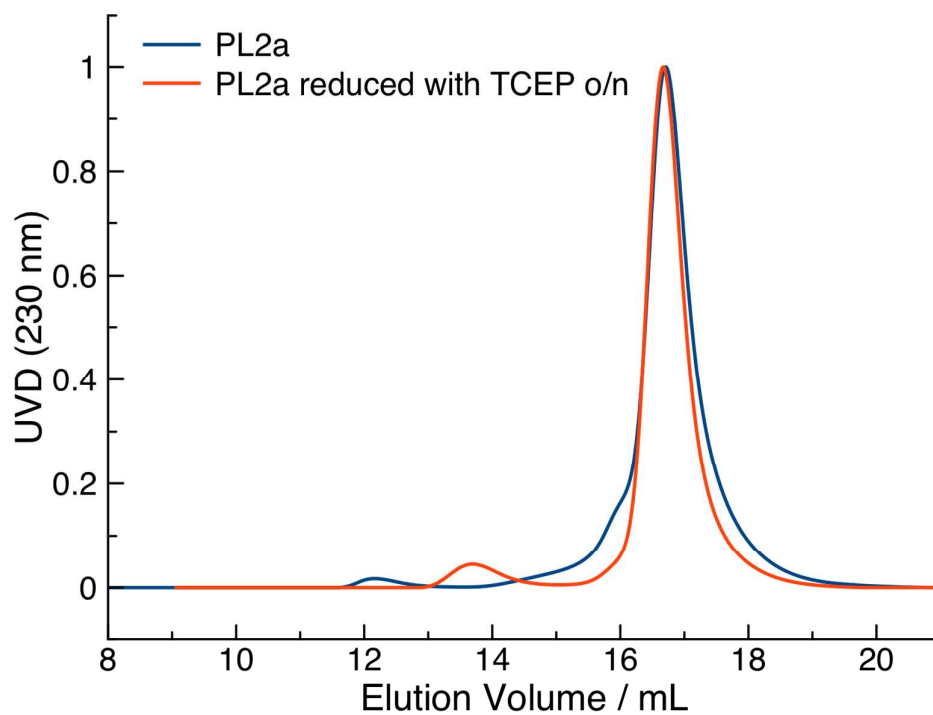

Figure S 19: GPC elugram (in HFIP) of **PL2a** before and after reduction with TCEP overnight.

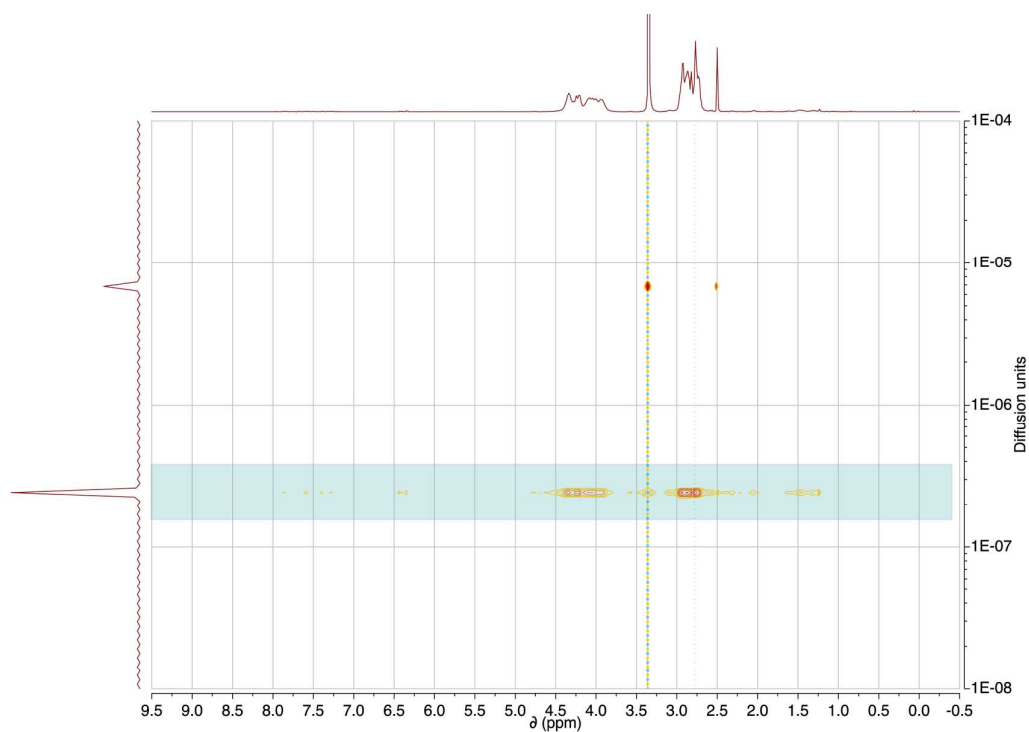

Figure S 20:  $^1\text{H}$  DOSY NMR in  $\text{DMSO-}d_6$  of **PL2a**.



## AFM Images and Particle Statistics

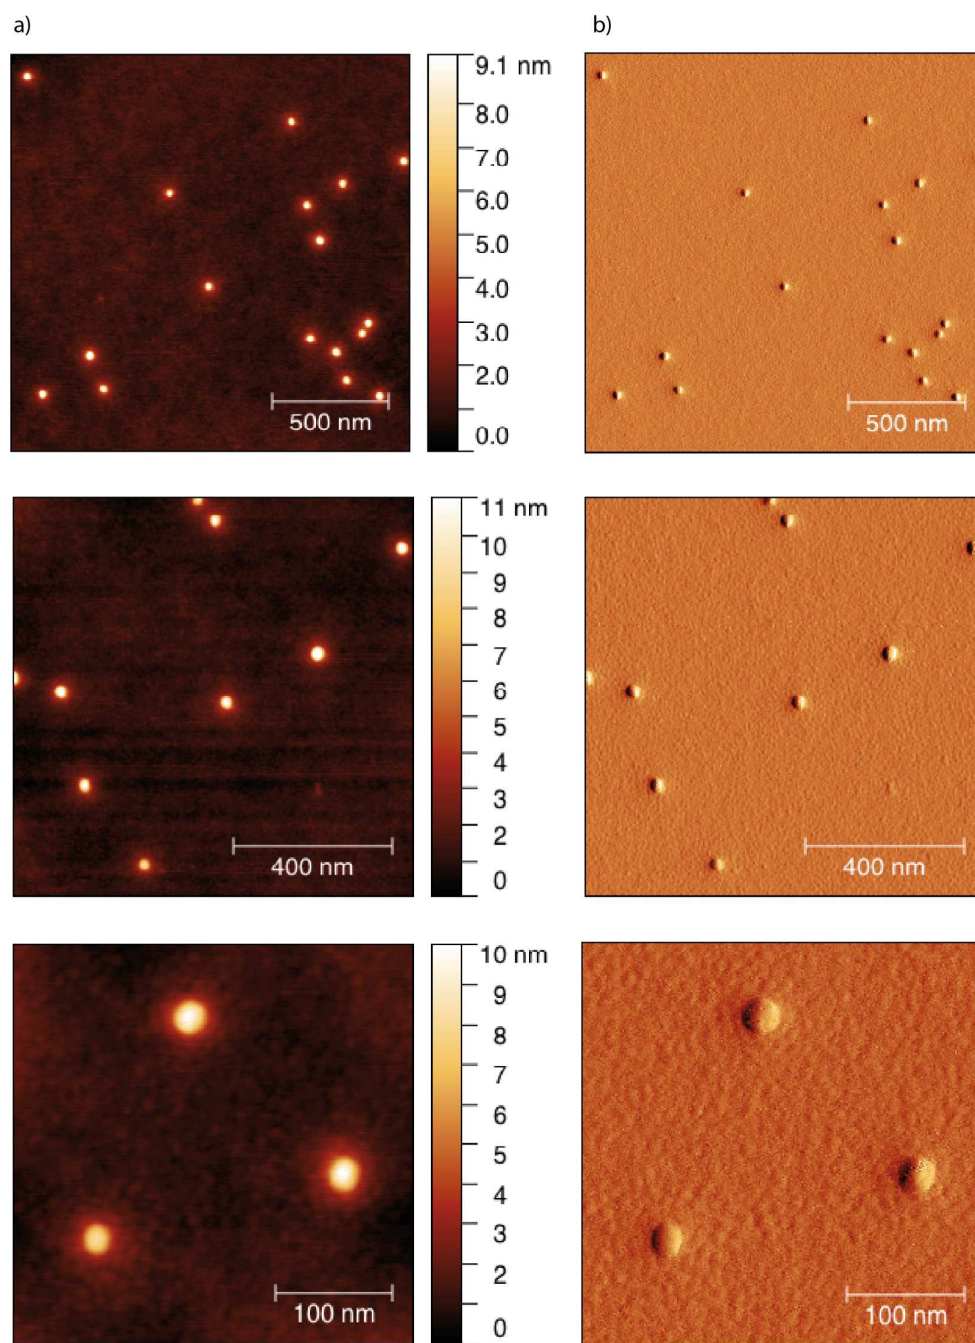

Figure S 21: AFM images (tapping mode) of QD@**PL1a** dried on Mica with a) height image and b) amplitude image.



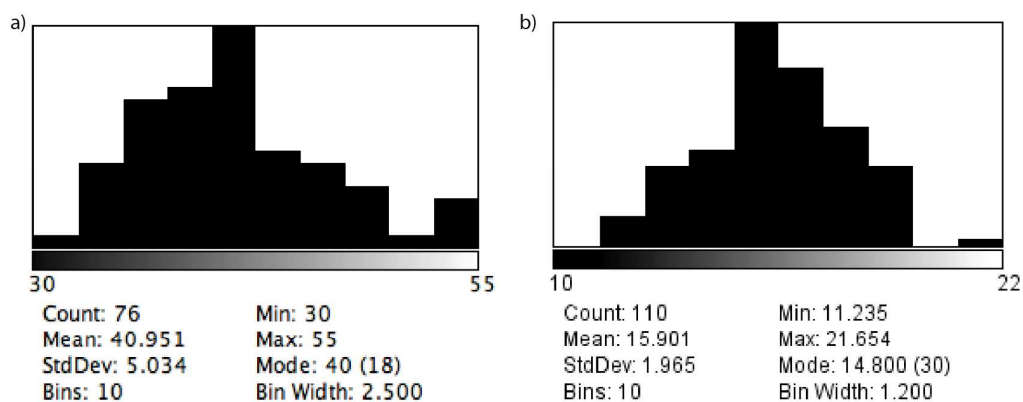

Figure S 22: Statistics of QD@**PL1a** obtained by counting of individual particles using ImageJ software for a) AFM and b) TEM. AFM data was analysed under the assumption that tip geometry is negligible.

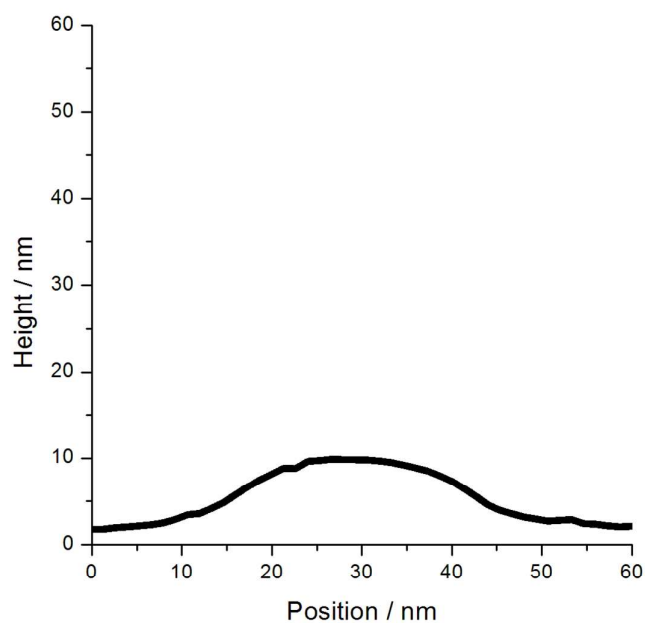

Figure S 23: AFM height profile of QD@**PL1a**.
